# Supplementary material for: Ad-Apoptin-hTERTp-E1a Regulates Autophagy Through the AMPK-mTOR-eIF4F Signaling Axis to Reduce Drug Resistance of MCF-7/ADR Cells
Source: Front Mol Biosci. 2021 Nov 19;8:763500. doi: 10.3389/fmolb.2021.763500 (PMC8640141; doi:10.3389/fmolb.2021.763500)
Supplement: Supplementary file 6 [file Table1.XLSX]

## Sheet: Sheet1
fig1B	10 MOI				20 MOI				40 MOI				60 MOI				80 MOI				100 MOI				120 MOI				140 MOI
MCF-7	97.1654	99.1654	93.1252	95.8946	81.4984	86.4949	88.4644	85.1656	66.4894	66.1965	75.6945	60.3185	56.1646	60.4545	60.2547	60.3491	54.2565	60.1546	45.7955	40.2596	45.6654	40.9552	30.1846	60.5465	50.4654	35.1546	40.1655	40.1565	40.6513	30.5466	50.1616	40.1654
fig1D	10 MOI				20 MOI				40 MOI				60 MOI				80 MOI				100 MOI				120 MOI				140 MOI
MCF-7/ADR	97.6454	92.4852	93.4852	95.1378	81.6542	86.5489	88.7154	75.4945	55.4654	55.4791	65.1984	60.9862	56.8956	50.4981	50.8943	50.6846	45.9846	45.9415	45.6841	40.4665	40.6542	40.4654	30.6546	30.8646	30.9841	35.8746	30.7652	40.9841	30.5465	30.4564	25.8745	30.8941
fig1F	300nM						400nM						500nM						600nM						700nM						800nM						900nM						1000nM						1500nM
MCF-7	62.4252	58.6604	54.1077	57.5222	51.6562	50.6056	40.7996	40.9747	37.8228	41.325	40.6245	42.0254	25.4779	26.0908	24.7775	26.4411	26.2659	24.4273	25.2152	26.7036	26.0908	27.4916	27.0538	24.9526	24.9526	25.8281	25.1277	25.8281	23.9019	21.538	21.1414	21.8049	21.5422	28.4547	26.2659	26.6161	21.519	22.0444	29.5053	29.9431	21.8787	25.3903	20.4684	20.8186	18.4547	20.1182	25.9156	25.7405	19.3302
fig1H	500 nM				600 nM				700 nM				800 nM				900 nM				1000 nM				1500 nM				2000 nM
MCF-7/ADR	104.968	105.839	100.007	100.558	102.27	103.228	102.241	94.4078	103.17	102.996	98.1214	96.8449	91.1874	97.077	94.901	93.3633	84.5144	93.2473	96.5257	93.6534	92.725	91.7966	93.9146	83.9051	91.0423	92.2028	95.1331	87.6188	87.9089	86.5453	77.7834	84.9496
fig1I	10 MOI			400nM+10MOI			500nM+10MOI			600nM+10MOI			700nM+10MOI			800nM+10MOI			900nM+10MOI
10MOI	95	92.8	93	95.6137	94.313	96.8412	103.742	102.649	106.881	103.241	105.415	108.347	95.5649	98.2153	99.6321	96.8626	92.1908	87.5221	96.8626	90.1908	87.5221
	20 MOI				400nM+20MOI				500nM+20MOI				600nM+20MOI				700nM+20MOI				800nM+20MOI				900nM+20MOI
20MOI	82.54	88.4956	88.1999	75.8	80.4918	83.3977	85.0149	90.2792	75.4817	84.2478	90.1352	87.4142	82.4328	81.1841	96.7149	78.0103	85.4957	89.7103	77.9144	93.3086	82.4952	78.9154	93.665	86.0846	80.7954	85.1499	79.901	82.1991
	40 MOI				400nM+40MOI				500nM+40MOI				600nM+40MOI				700nM+40MOI				800nM+40MOI				900nM+40MOI
40MOI	66.5492	67.1223	60.4933	70.0249	70.4646	76.0916	60.7286	69.5873	66.1193	62.9391	62.8336	65.098	67.1268	68.3468	76.921	60.5741	78.4905	69.6077	54.6316	69.6351	67.2088	71.5681	67.7366	64.2683	65.9006	63.0425	63.5771	69.1973
	60 MOI				400nM+60MOI				500nM+60MOI				600nM+60MOI				700nM+60MOI				800nM+60MOI				900nM+60MOI
60MOI	59.9545	56.0337	56.2975	65.6647	52.7878	47.6458	46.0153	50.342	39.0076	49.3985	35.7832	47.2061	45.9145	30.3817	45.0565	42.3603	43.7221	35.6122	44.629	39.7771	42.9939	40.3359	43.7863	34.229	36.4397	35.8412	38.6504	33.0265
fig2H	Ad-MOCK(60MOI)						Ad-VT(60MOI)						ADR(400nM)						ADR(500nM)						ADR(600nM)						Ad-VT(60MOI)+ADR(400nM)						Ad-VT(60MOI)+ADR(500nM)						Ad-VT(60MOI)+ADR(600nM)
CQ	105.446	100.094	104.59	101.451	102.45	102.878	61.3297	60.6088	60.4662	64.8895	54.1879	64.8895	101.451	97.0274	102.307	106.302	99.5958	98.5439	106.73	109.727	100.88	101.023	105.446	99.1257	102.307	99.3455	98.0262	90.6065	101.879	99.3104	50.9037	50.9974	54.1855	51.7598	55.4697	58.6088	53.044	54.0295	56.0405	47.0512	51.6172	57.7527	55.1146	52.3277	55.2519	58.0381	57.4673	53.9002
	Ad-MOCK(60MOI)						Ad-VT(60MOI)						ADR(400nM)						ADR(500nM)						ADR(600nM)						Ad-VT(60MOI)+ADR(400nM)						Ad-VT(60MOI)+ADR(500nM)						Ad-VT(60MOI)+ADR(600nM)
3-MA	101.005	99.2885	101.589	104.606	98.4755	97.9889	70.0001	64.7778	63.8454	62.8316	56.2147	71.2647	96.6266	120.954	110.736	99.2644	106.066	110.444	95.167	102.368	107.622	102.014	109.763	97.8916	109.763	109.179	102.27	100.645	107.331	110.444	65.107	68.1236	66.5422	66.1774	61.1174	70.7509	63.1609	63.5501	71.7239	67.3451	69.3886	67.7741	72.5024	73.4755	70.2194	67.3451	64.7178	60.3389
fig2I	Ad-MOCK(60MOI)						Ad-VT(60MOI)						ADR(400nM)						ADR(500nM)						ADR(600nM)						Ad-VT(60MOI)+ADR(400nM)						Ad-VT(60MOI)+ADR(500nM)						Ad-VT(60MOI)+ADR(600nM)
MRP1	99.4876	99.4876	101.077	94.4876	97.9631	97.4765	59.4876	64.2654	69.4876	59.4876	59.4876	57.4876	96.1142	99.4876	99.4876	99.4876	105.553	109.932	94.6546	101.855	99.4876	99.4876	99.4876	97.3792	99.4876	99.4876	101.758	99.4876	106.818	99.4876	64.5946	69.4876	74.4876	59.4876	60.605	70.2385	62.6485	54.4876	59.4876	59.4876	64.4876	69.4876	59.4876	59.4876	69.4876	66.8327	64.2054	59.8265
fig3F	Ad-MOCK(60MOI)						Ad-VT(60MOI)						ADR(400nM)						ADR(500nM)						ADR(600nM)						Ad-VT(60MOI)+ADR(400nM)						Ad-VT(60MOI)+ADR(500nM)						Ad-VT(60MOI)+ADR(600nM)
mTOR	100.69	100.929	101.274	94.6846	98.1601	97.6735	60.1546	64.4624	60.6846	59.8946	55.8993	57.6846	96.3112	98.6846	99.8846	102.685	105.75	110.129	94.8516	102.052	100.669	100.685	100.185	97.5762	99.6846	101.685	101.955	99.7846	107.015	100.231	64.7916	69.6846	70.6846	59.9286	60.802	70.4355	62.8455	54.6846	59.9386	59.6846	64.6846	63.8096	60.4786	59.8846	61.6986	67.0297	64.4024	60.0235
fig4D	Ad-MOCK(60MOI)						Ad-VT(60MOI)						ADR(400nM)						ADR(500nM)						ADR(600nM)						Ad-VT(60MOI)+ADR(400nM)						Ad-VT(60MOI)+ADR(500nM)						Ad-VT(60MOI)+ADR(600nM)
siAMPK	98.0384	94.4073	94.7829	95.5342	97.0246	97.0367	60.2671	65.9098	63.6477	63.8794	60.8931	60.5175	93.1552	94.7829	92.4754	91.7779	93.2804	96.035	91.1519	96.6611	97.6627	102.045	99.0198	93.6561	92.7796	90.2754	99.04	99.4713	103.297	98.0384	55.0375	54.8915	51.8864	62.2788	57.2704	58.7729	58.3973	55.4512	54.6494	55.2754	47.5125	52.8965	51.6444	51.2687	47.8881	50.3923	52.3177	54.2738
	Ad-MOCK(60MOI)						Ad-VT(60MOI)						ADR(400nM)						ADR(500nM)						ADR(600nM)						Ad-VT(60MOI)+ADR(400nM)						Ad-VT(60MOI)+ADR(500nM)						Ad-VT(60MOI)+ADR(600nM)
AKT	107.168	100.022	110.219	108.693	92.2217	103.305	62.969	65.0472	68.6629	61.1388	57.9868	59.6136	93.3401	99.9492	99.3477	90.7982	86.8327	95.0686	97.7123	99.2344	100.661	89.6797	97.4072	100.559	92.3233	104.423	100.322	94.8653	90.3915	89.9847	55.4093	55.9141	56.5277	50.122	58.6985	43.4774	36.4616	40.2219	44.5958	40.6304	45.2059	42.2572	44.9139	45.1042	43.6807	40.0203	41.6472	44.1891
	Ad-MOCK(60MOI)						Ad-VT(60MOI)						ADR(400nM)						ADR(500nM)						ADR(600nM)						Ad-VT(60MOI)+ADR(400nM)						Ad-VT(60MOI)+ADR(500nM)						Ad-VT(60MOI)+ADR(600nM)
ERK1	106.62	99.4076	109.67	108.145	91.6736	102.756	57.4209	59.6733	63.1148	55.5907	52.4387	54.0655	92.792	99.4011	95.1875	90.2501	86.2846	94.5205	97.1642	98.3885	100.113	89.1316	96.8591	100.011	91.7752	103.875	97.2288	94.3172	89.8434	89.4366	45.8612	45.1091	46.9796	59.5739	60.1504	43.9293	36.9135	40.4361	45.0477	41.0823	45.6578	42.7091	45.3461	45.5561	44.1326	40.4722	42.0991	44.641
	Ad-MOCK(60MOI)						Ad-VT(60MOI)						ADR(400nM)						ADR(500nM)						ADR(600nM)						Ad-VT(60MOI)+ADR(400nM)						Ad-VT(60MOI)+ADR(500nM)						Ad-VT(60MOI)+ADR(600nM)
ERK2	106.122	98.9095	109.172	107.647	91.1755	102.258	56.9228	59.1752	62.6167	55.0926	51.9406	53.5674	92.2939	98.903	94.6894	89.752	85.7865	94.0224	96.6661	97.8904	99.6147	88.6335	96.361	99.513	91.2771	103.377	96.7307	93.8191	89.3453	88.9385	45.3631	44.611	46.4815	59.0758	59.6523	43.4312	36.4154	39.938	44.5496	40.5842	45.1597	42.211	44.848	45.058	43.6345	39.9741	41.601	44.1429
fig5E	Ad-MOCK(60MOI)						Ad-VT(60MOI)						ADR(400nM)						ADR(500nM)						ADR(600nM)						Ad-VT(60MOI)+ADR(400nM)						Ad-VT(60MOI)+ADR(500nM)						Ad-VT(60MOI)+ADR(600nM)
si4EBP1	99.1295	98.7961	99.0379	99.0184	100.685	99.3518	62.018	60.2245	58.5729	57.1282	53.6831	53.4609	106.242	100.465	110.02	106.131	106.02	107.242	103.353	100.002	108.687	103.13	98.9072	96.4623	100.019	99.1284	101.463	93.9063	85.7937	94.0174	49.2379	53.6444	60.6844	53.9054	52.3495	55.5724	43.7924	56.128	55.6484	53.572	58.7952	51.6828	52.0143	52.6475	51.016	50.7937	49.6805	51.3475
	Ad-MOCK(60MOI)						Ad-VT(60MOI)						ADR(400nM)						ADR(500nM)						ADR(600nM)						Ad-VT(60MOI)+ADR(400nM)						Ad-VT(60MOI)+ADR(500nM)						Ad-VT(60MOI)+ADR(600nM)
EIF4E	98.9341	98.6007	98.2168	98.823	100.49	99.1564	63.8226	62.8165	60.3775	58.9328	55.4877	55.2655	106.046	99.3	90.8046	105.935	105.824	89.8046	103.157	95.2698	91.8046	102.935	98.7118	96.2669	99.8232	95.1232	94.8046	93.7109	85.5983	93.822	57.0425	58.2987	58.489	51.71	60.1541	53.377	56.597	53.9326	58.3687	61.3766	56.5998	49.4874	50.7826	50.8687	48.8206	58.5983	57.4851	49.1521
	Ad-MOCK(60MOI)						Ad-VT(60MOI)						ADR(400nM)						ADR(500nM)						ADR(600nM)						Ad-VT(60MOI)+ADR(400nM)						Ad-VT(60MOI)+ADR(500nM)						Ad-VT(60MOI)+ADR(600nM)
siS6K	98.9361	98.6027	98.5497	98.825	100.492	99.1584	60.8246	60.1261	57.3795	55.9348	62.4897	62.2675	106.049	102.147	109.827	105.937	105.826	107.049	103.159	104.807	108.493	102.937	98.7138	96.2689	99.8252	102.807	101.27	93.7129	85.6003	93.824	44.0445	49.9166	55.491	48.712	47.1561	50.379	38.599	40.9346	44.9576	48.3786	43.6018	46.4894	36.8209	39.8066	45.8226	45.6003	34.4871	36.1541
fig6B	ADR						Ad-VT						Ad-VT+ADR						Ad-MOCK						Control						3-MA						3-MA+Ad-VT						3-MA+ADR						3-MA+ADR+Ad-VT
	191.859	97.0496	66.78	154.481	93.5651	125.269	266.243	373.67	376.265	209.414	328.515	474.353	275.736	212.907	329.104	249.524	104.993	143.755	557.743	344.965	147.471	202.213	239.893	169.131	273.182	79.9917	178.568	183.731	75.7424	156.476	463.332	107.315	311.276	218.057	289.322	187.906	50.4204	202.764	138.51	39.366	115.919	51.4116	114.139	243.049	212.095	297.331	250.02	154.031	107.379
	268.873	75.8661	37.3355	152.429	62.7543	21.8821	103.044	231.225	233.86	111.643	229.977	189.638	134.492	50.2768	112.364	113.435	51.4966	42.5079	214.139	511.266	52.9254	143.04	156.805	137.795	154.618	101.097	203.191	92.2596	75.1828	96.4722	260.648	123.294	217.063	154.239	184.691	124.088	67.3534	85.5043	140.686	131.226	139.326	143.272	69.9316	90.9986	125.142	168.055	90.9986	150.136	91.7569
	132.86	59.801	53.7802	110.74	55.0368	44.3456	86.4871	107.165	154.076	79.5552	98.8036	128.066	107.822	46.7579	69.6983	174.546	58.5562	17.621	262.193	186.554	78.608	59.2203	79.4835	160.221	157.907	83.336	52.9272	80.5596	68.5216	148.176	238.191	146.415	192.563	111.65	180.899	81.4987	77.4574	76.5455	200.95	49.2844	80.7072	61.33	218.133	55.4478	118.198	115.025	92.5366		32.006
	101.306	117.998		112.808			77.9164	80.1605	158.61	65.1543	78.4977	121.038		40.6426	35.0239	166.907	41.5938	25.0141	336.393	143.828	56.1889	128.202	120.473	224.425	321.978	166.958	113.237	186.622	160.367	131.92	304.547	212.679	337.569	186.594	270.011	156.443	74.5194	40.6928	224.334	69.292	89.9466	81.3376				121.031	233.949
	101.233	115.921		113.55			130.902	130.902	187.153	61.3286	54.1254	120.226		60.1612	30.4411	65.0515	39.366	30.1215	367.84	134.4	28.4463	134.838	126.03	226.813	431.992	87.9215	122.389	195.46	216.859	182.25	512.096	290.678	364.568	220.976	311.442	190.825	138.853	229.529	150.541	100.487	82.5976	112.532				100.31	233.949
	125.011	251.003		283.151			130.902	130.902	187.153	61.3286	54.2471	116.164		50.1612	31.0644	52.0011	32.041	35.0611	534.18	269.444	150.303	292.726	106.838	400.403	519.388	299.837	125.338	327.933	271.064	237.569	743.39	380.219	370.386	360.246	472.058	330.095	247.012	90.5578	156.151	160.416	102.675	172.462					233.949
fig6C	ADR						Ad-VT						Ad-VT+ADR						Ad-MOCK						Control						Rapa						Rapa+ADR						Rapa+Ad-VT						Rapa+Ad-VT+ADR
	191.859	97.0496	66.78	154.481	93.5651	125.269	266.243	373.67	376.265	209.414	328.515	474.353	275.736	212.907	329.104	249.524	104.993	143.755	557.743	344.965	147.471	202.213	239.893	169.131	273.182	79.9917	178.568	183.731	75.7424	156.476	33.813	226.76	119.463	187.354	231.47	98.9157	263.744	109.779	53.5556	44.9921	97.517	327.074	268.352	132.534	64.6088	299.972	134.312	276.71	55.742
	268.873	75.8661	37.3355	152.429	62.7543	21.8821	103.044	231.225	233.86	111.643	229.977	189.638	134.492	50.2768	112.364	113.435	51.4966	42.5079	214.139	511.266	52.9254	143.04	156.805	137.795	154.618	101.097	203.191	92.2596	75.1828	96.4722	49.2844	79.9952	92.5344	151.374	98.749	71.9874	38.0683	131.585	23.232	70.7538	47.7617	180.309	130.902	119.553	76.0919	146.069	77.6263	129.945	60.7426
	132.86	59.801	53.7802	110.74	55.0368	44.3456	86.4871	107.165	154.076	79.5552	98.8036	128.066	107.822	46.7579	69.6983	174.546	58.5562	17.621	262.193	186.554	78.608	59.2203	79.4835	160.221	157.907	83.336	52.9272	80.5596	68.5216	148.176	58.3196	64.3149	77.9164	136.836	51.9563	57.3694	117.728	82.1272	20.7205	54.5418	86.7105	164.629	97.2542	103.915	82.6286	142.947	55.2449	114.265	44.3761
	101.306	117.998		112.808			77.9164	80.1605	158.61	65.1543	78.4977	121.038		40.6426	35.0239	166.907	41.5938	25.0141	336.393	143.828	56.1889	128.202	120.473	224.425	321.978	166.958	113.237	186.622	160.367	131.92	40.6001	102.097	95.6643	150.486	75.2199	75.1173	95.559	114.133	13.3393	47.2798	95.8504	202.411	61.3286	175.057	84.2884	136.836	98.5899	152.047	46.2982
	101.233	115.921		113.55			130.902	130.902	187.153	61.3286	54.1254	120.226		60.1612	30.4411	65.0515	39.366	30.1215	367.84	134.4	28.4463	134.838	126.03	226.813	431.992	87.9215	122.389	195.46	216.859	182.25	71.874	90.9986	80.7072	176.242	57.8689	60.1602	114.133	161.243	20.1241	50.134	85.75	191.313	115.025	143.983	85.0171	192.144	121.426	140.949	40.364
	125.011	251.003		283.151			130.902	130.902	187.153	61.3286	54.2471	116.164		50.1612	31.0644	52.0011	32.041	35.0611	534.18	269.444	150.303	292.726	106.838	400.403	519.388	299.837	125.338	327.933	271.064	237.569	194.672	98.8617	201.089	337.585	80.2816	180.542	120.345	115.025	21.0611	49.344	86.324	199.176	115.025	143.983	85.0171	150.344	121.426	148.812	40.941
[truncated: 11 more columns]
